# Supplementary material for: Selective and tunable synthesis of 3-arylsuccinimides and 3-arylmaleimides from arenediazonium tetrafluoroborates and maleimides
Source: Royal Society of Chemistry journal article supplement (doi:10.1039/c6ra00136j), 2016-01-01

## Supporting Information for

### Selective and tunable synthesis of 3-arylsuccinimides and 3-arylmaleimides from arenediazonium tetrafluoroborates and maleimides

Zhen-Hua Yang<sup>a,1</sup>, Zhong-Hui Chen<sup>a,1</sup>, Yu-Long An<sup>a</sup>, and Sheng-Yin Zhao<sup>\*a,b</sup>

<sup>a</sup>Department of Chemistry, Donghua University, No.2999 North Renmin Road,  
Shanghai 201620, P. R. of China;

<sup>b</sup>State Key Laboratory of Bioorganic & Natural Products Chemistry, Shanghai Institute of  
Organic Chemistry, Chinese Academy of Sciences, Shanghai 200032, P. R. of China.

Tel: +86 21 67792436; Fax: +86 21 67792608-805;

E-mail: syzhao8@dhu.edu.cn

#### Content:

**<sup>1</sup>H NMR and <sup>13</sup>C NMR spectra of the products.**

## <sup>1</sup>H NMR and <sup>13</sup>C NMR spectra

<sup>1</sup>H and <sup>13</sup>C NMR spectra were recorded using a Bruker AV 400 MHz spectrometer in CDCl<sub>3</sub> or DMSO-d<sub>6</sub> with tetramethylsilane as internal standard.

### 3-phenylpyrrolidine-2,5-dione (4a) in CDCl<sub>3</sub>

#### <sup>1</sup>H NMR

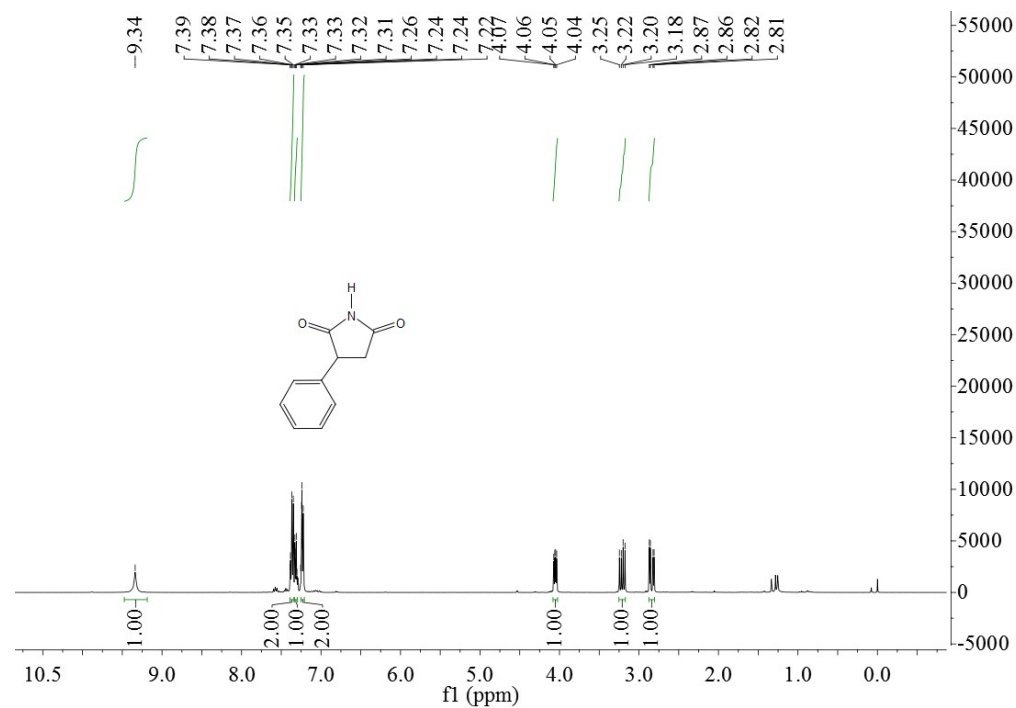

#### <sup>13</sup>C NMR

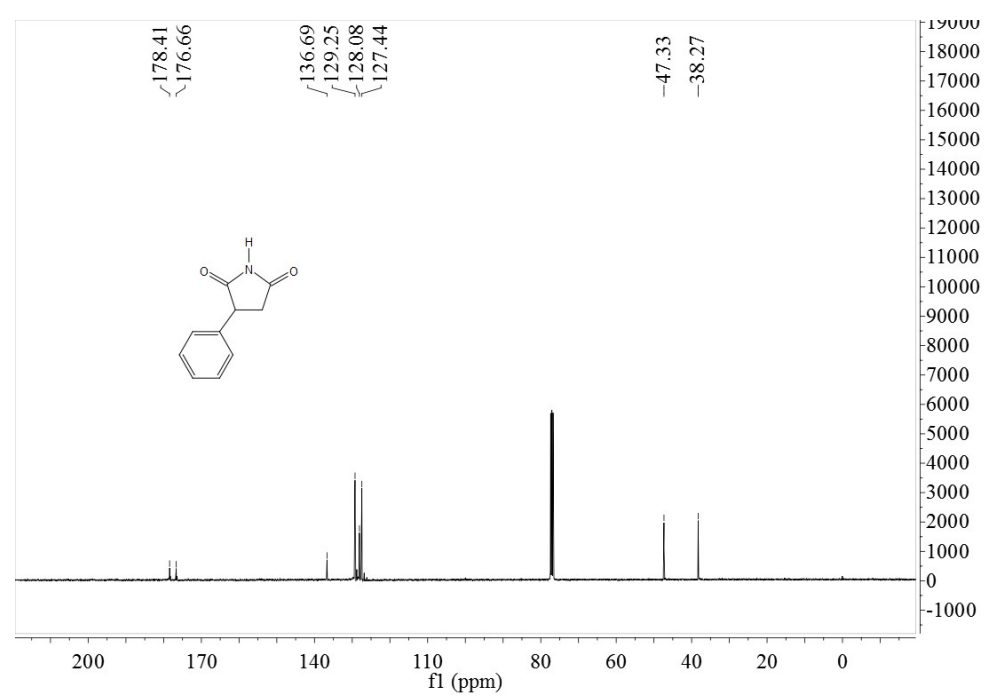

### 3-(4-nitrophenyl)-pyrrolidine-2,5-dione (4b) in CDCl<sub>3</sub>

#### <sup>1</sup>H NMR

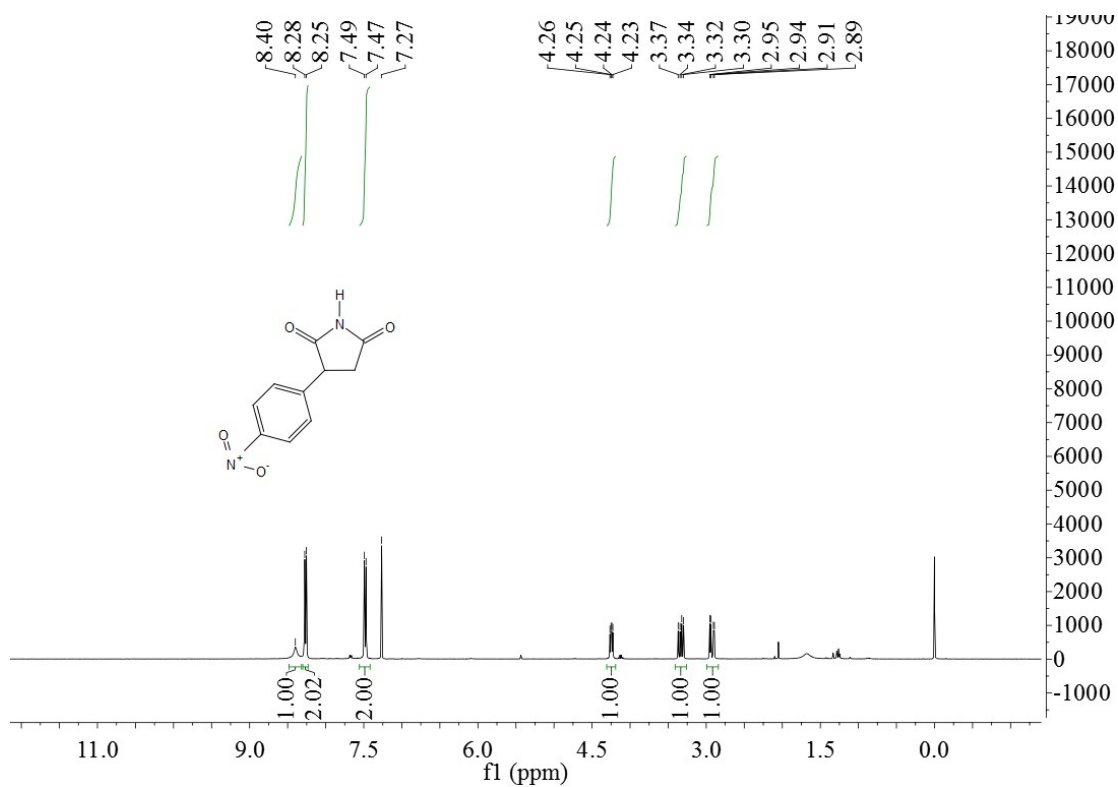

#### <sup>13</sup>C NMR

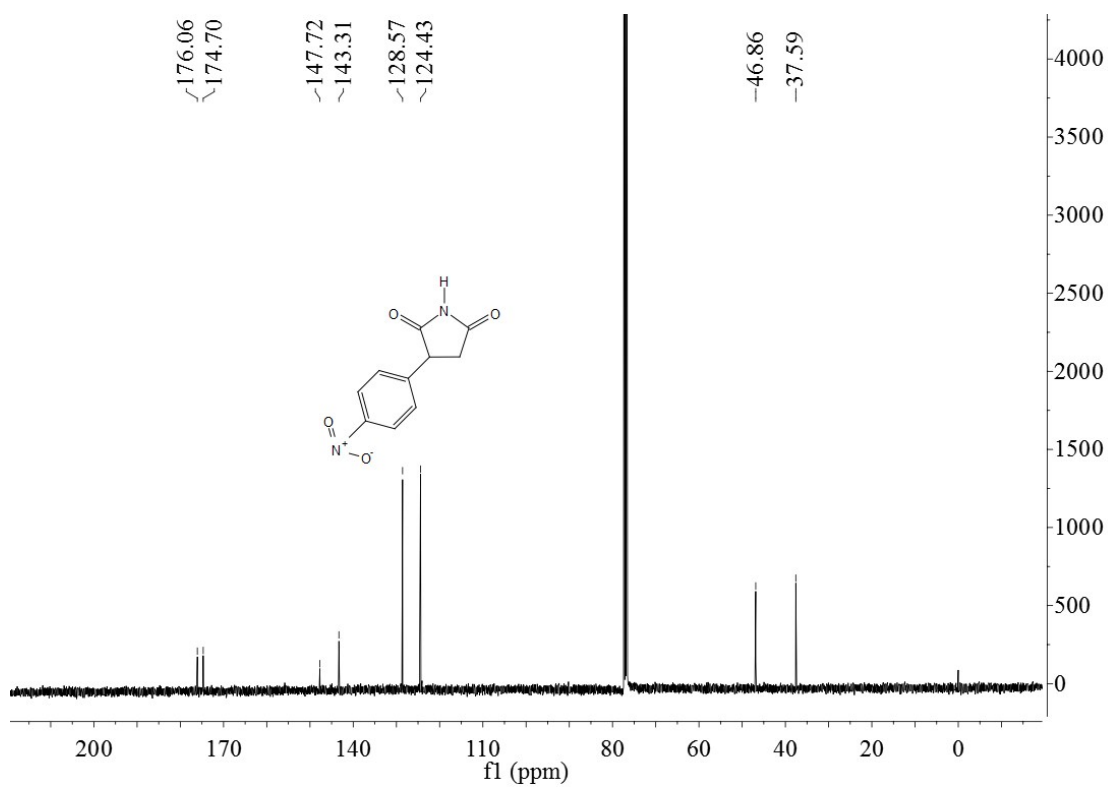

### 3-(4-chlorophenyl)-pyrrolidine-2,5-dione (4c) in CDCl<sub>3</sub>

#### <sup>1</sup>H NMR

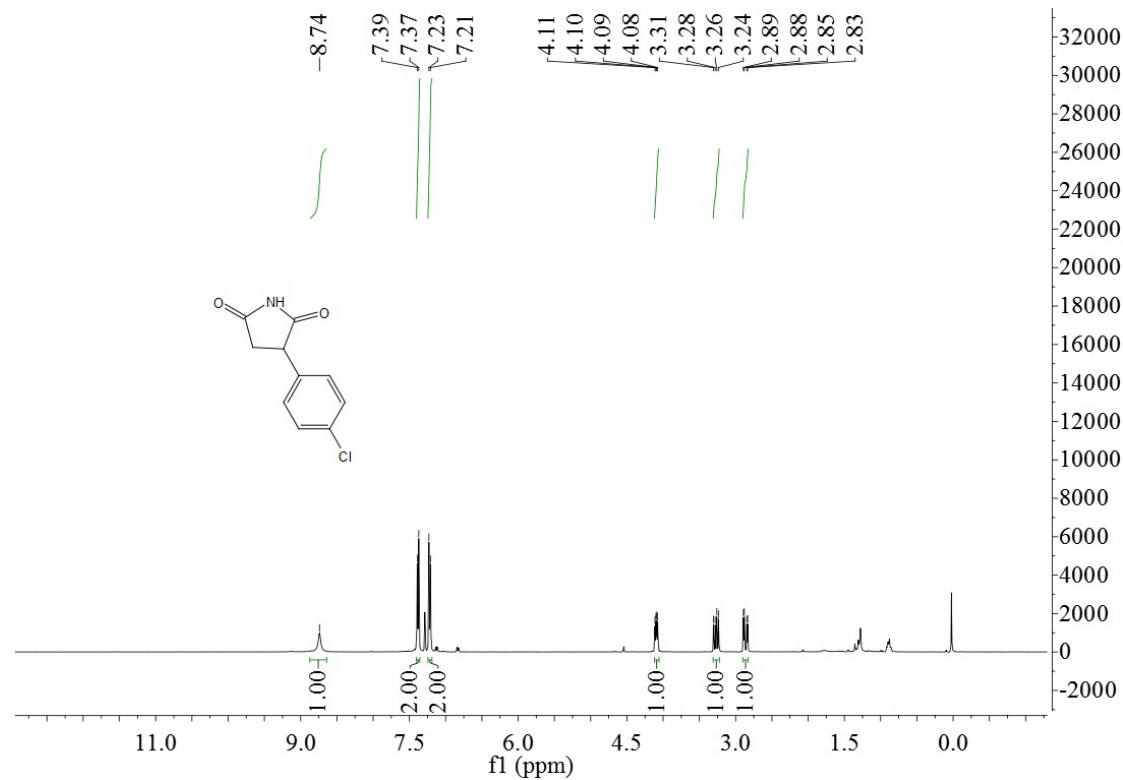

#### <sup>13</sup>C NMR

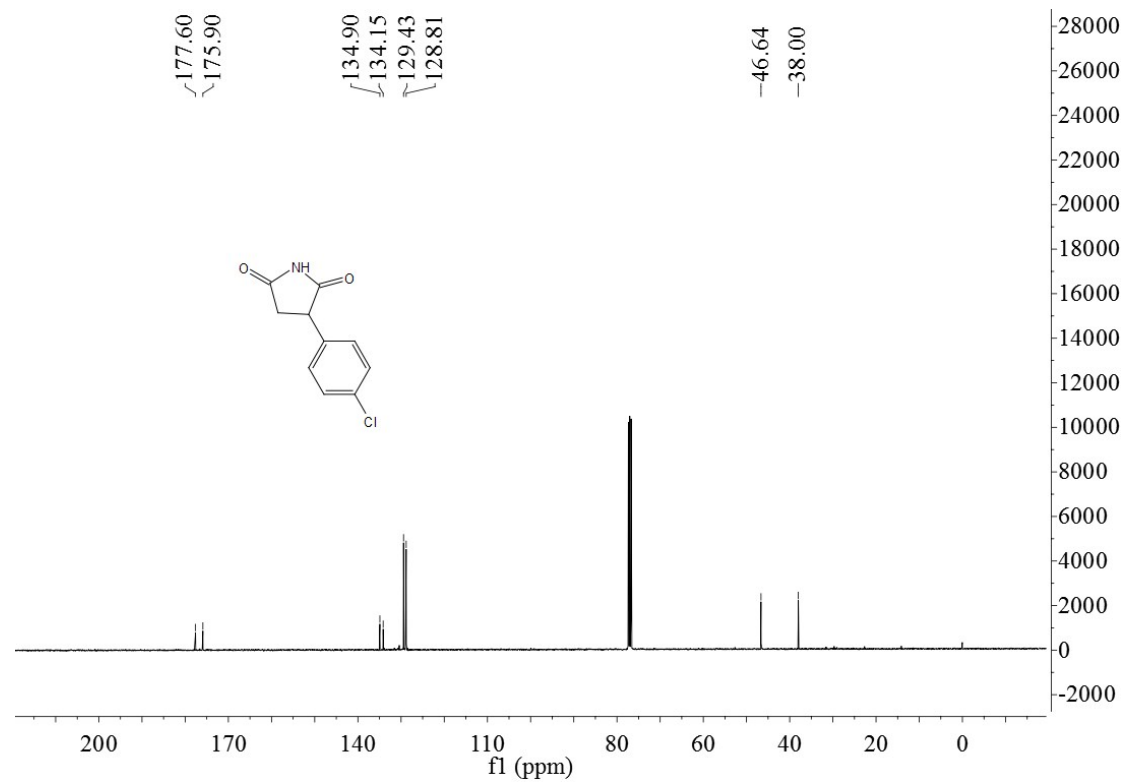

### 3-(4-bromophenyl)-pyrrolidine-2,5-dione (4d) in CDCl<sub>3</sub>

#### <sup>1</sup>H NMR

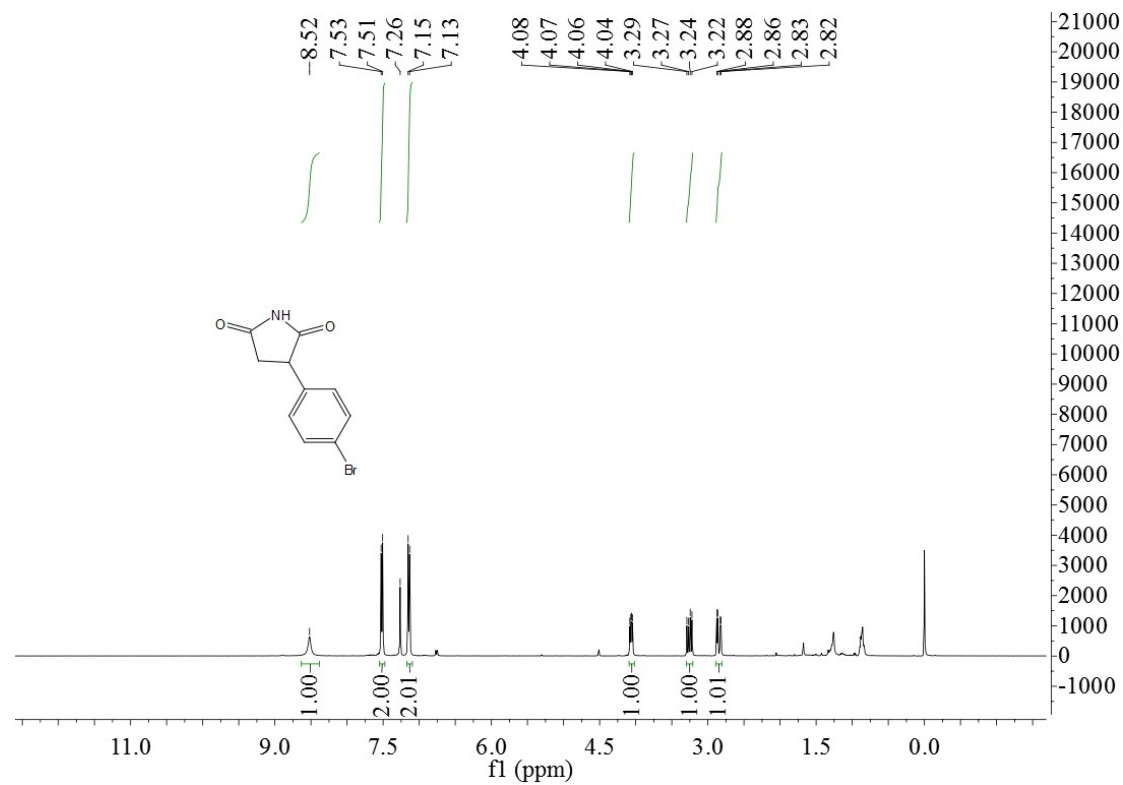

#### <sup>13</sup>C NMR

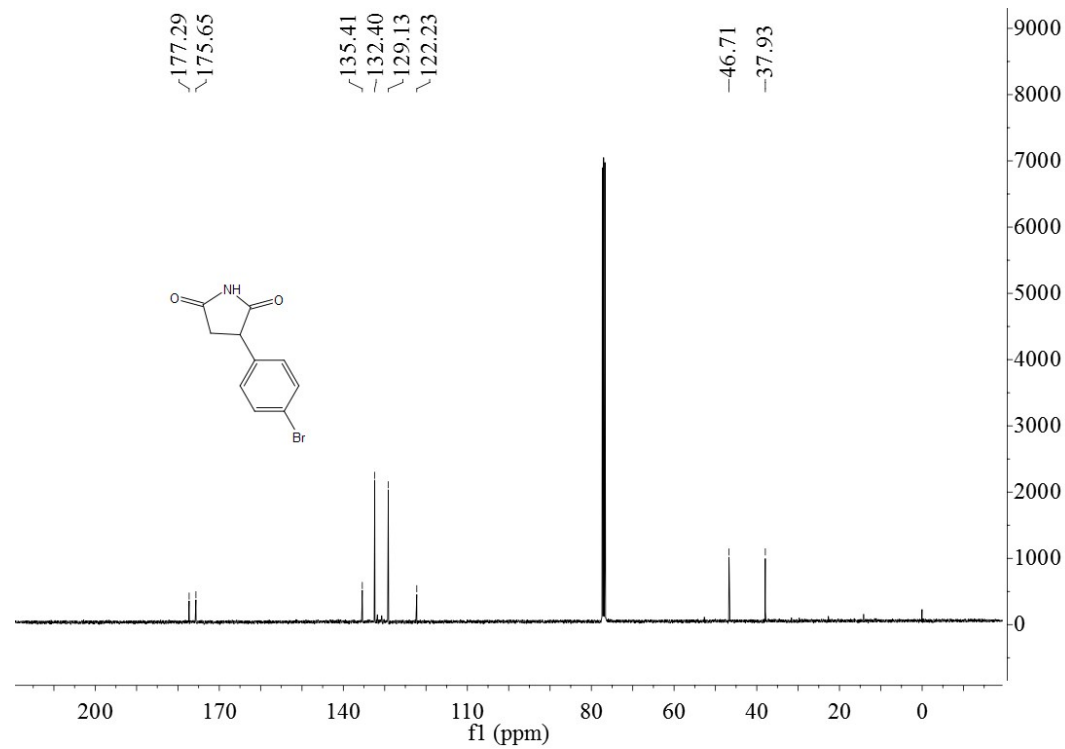

### 3-(4-methoxyphenyl)-pyrrolidine-2,5-dione (4e) in CDCl<sub>3</sub>

#### <sup>1</sup>H NMR

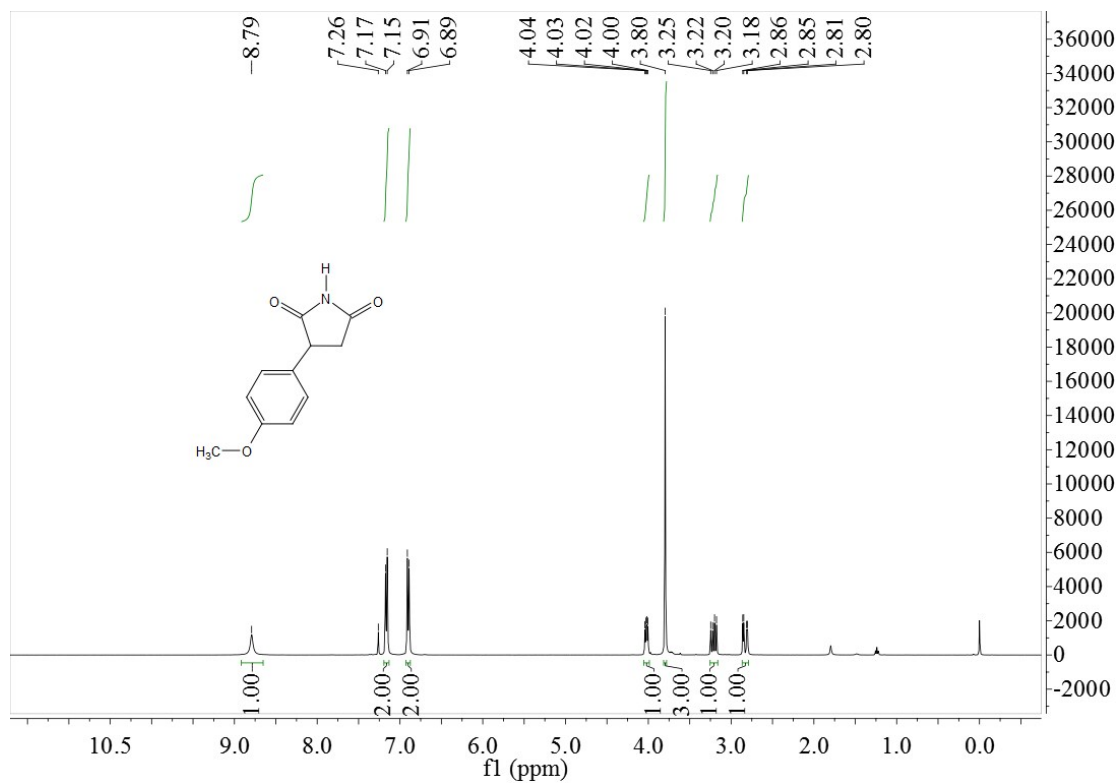

#### <sup>13</sup>C NMR

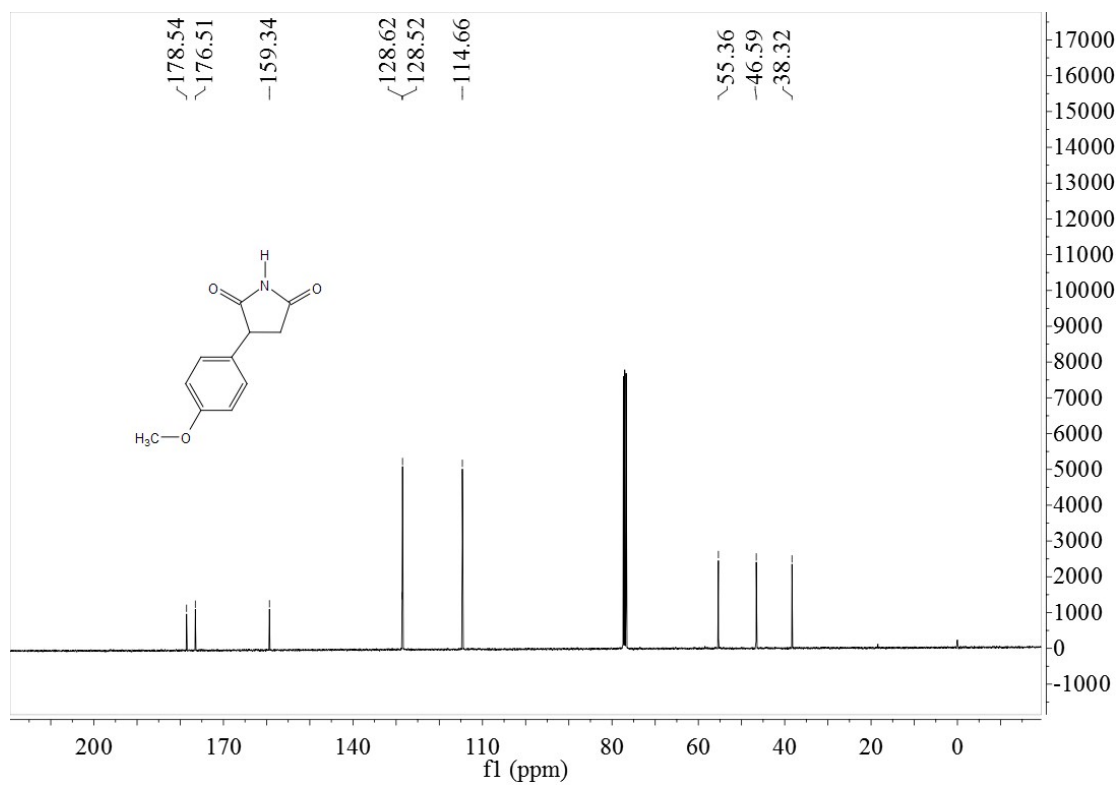

### 3-(2-chloro-6-methylphenyl)-pyrrolidine-2,5-dione (4f) in CDCl<sub>3</sub>

#### <sup>1</sup>H NMR

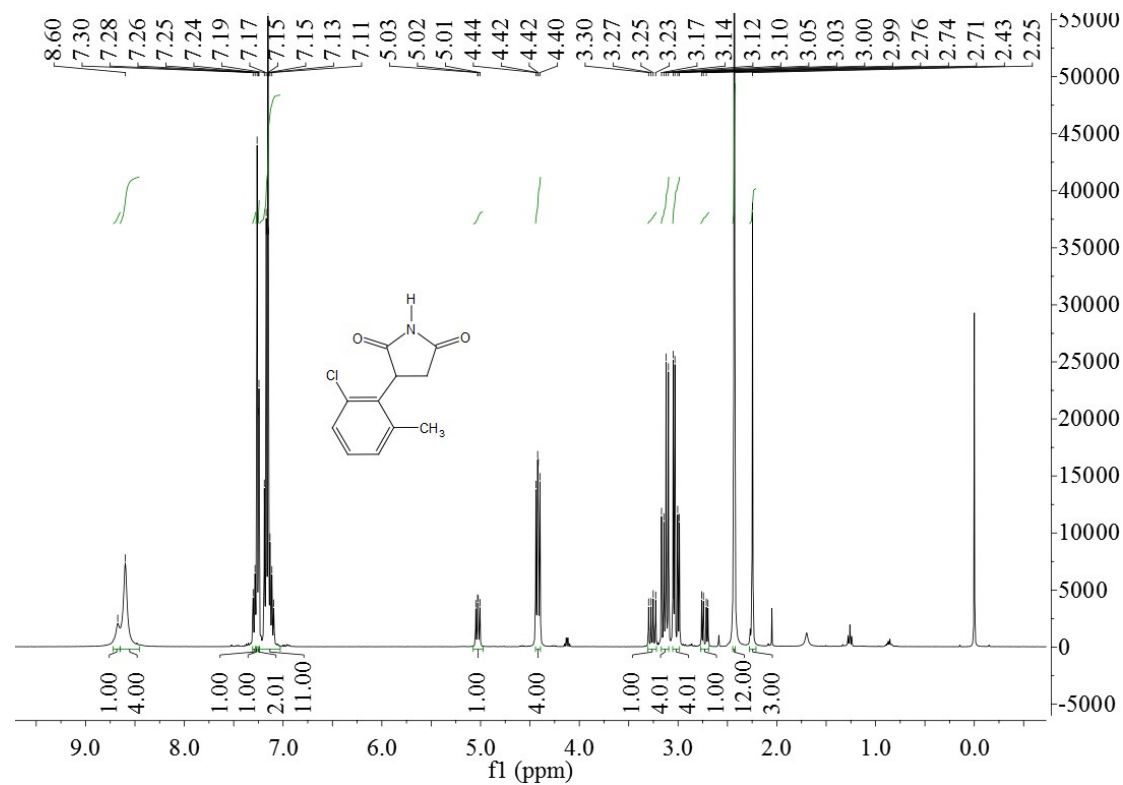

#### <sup>13</sup>C NMR

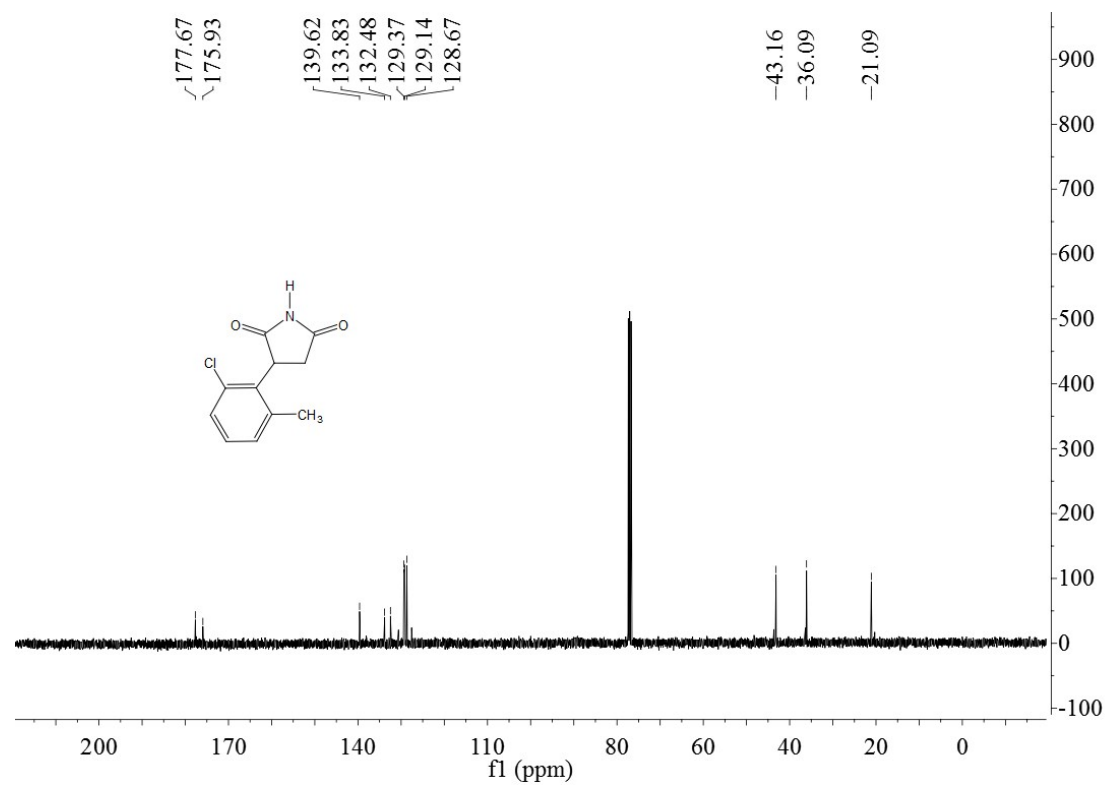

### 3-(Naphthalen-2-yl)-pyrrolidine-2,5-dione (4g) in DMSO-d<sub>6</sub>

#### <sup>1</sup>H NMR

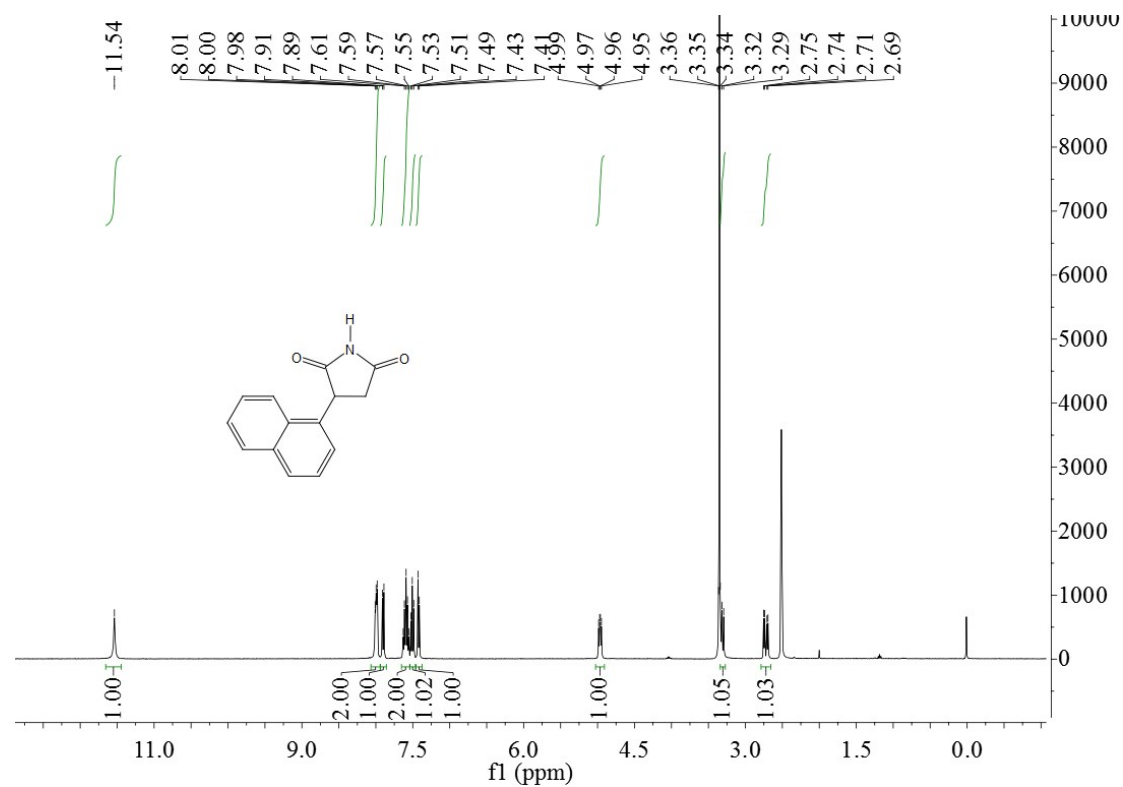

#### <sup>13</sup>C NMR

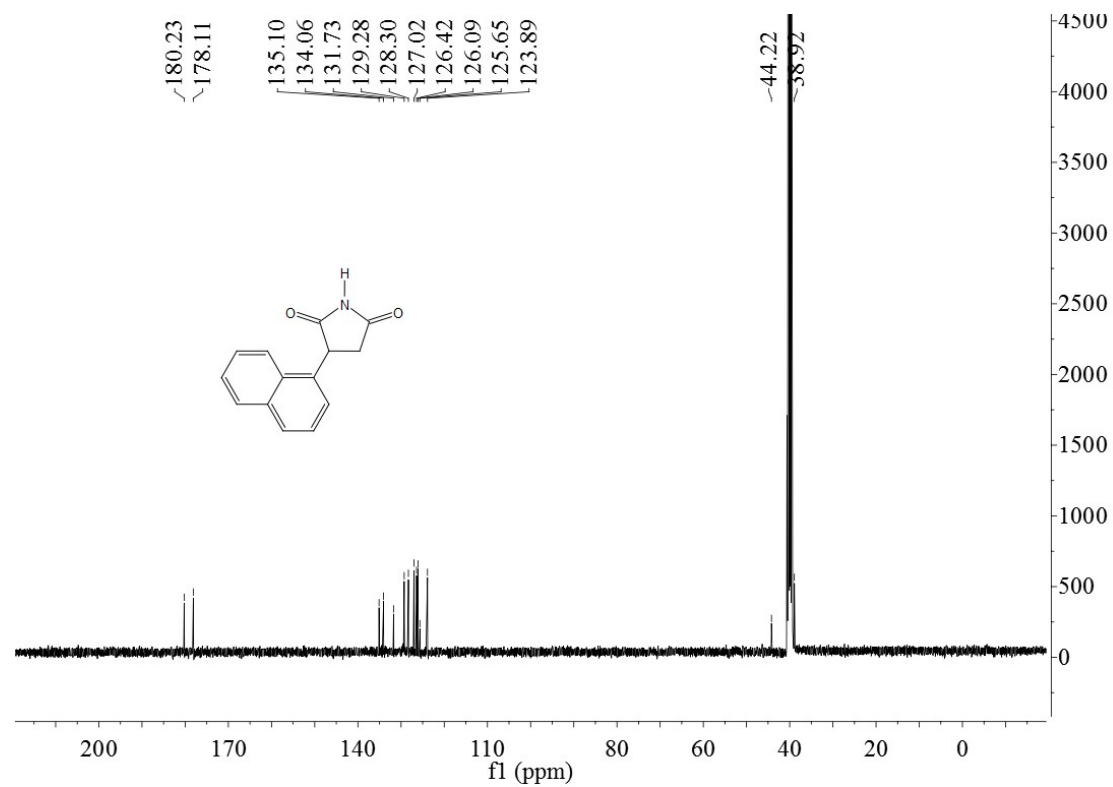



# 1-methyl-3-phenyl-pyrrolidine-2,5-dione (4h) in CDCl<sub>3</sub>

## <sup>1</sup>H NMR

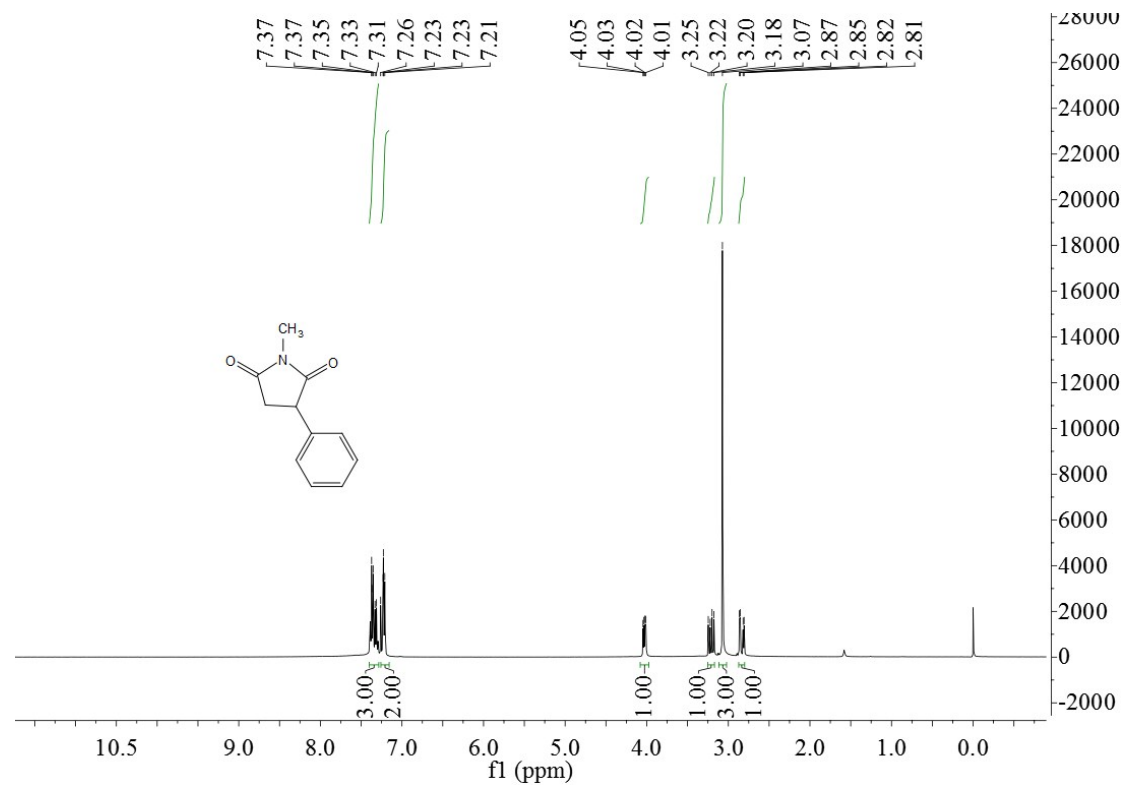

## <sup>13</sup>C NMR

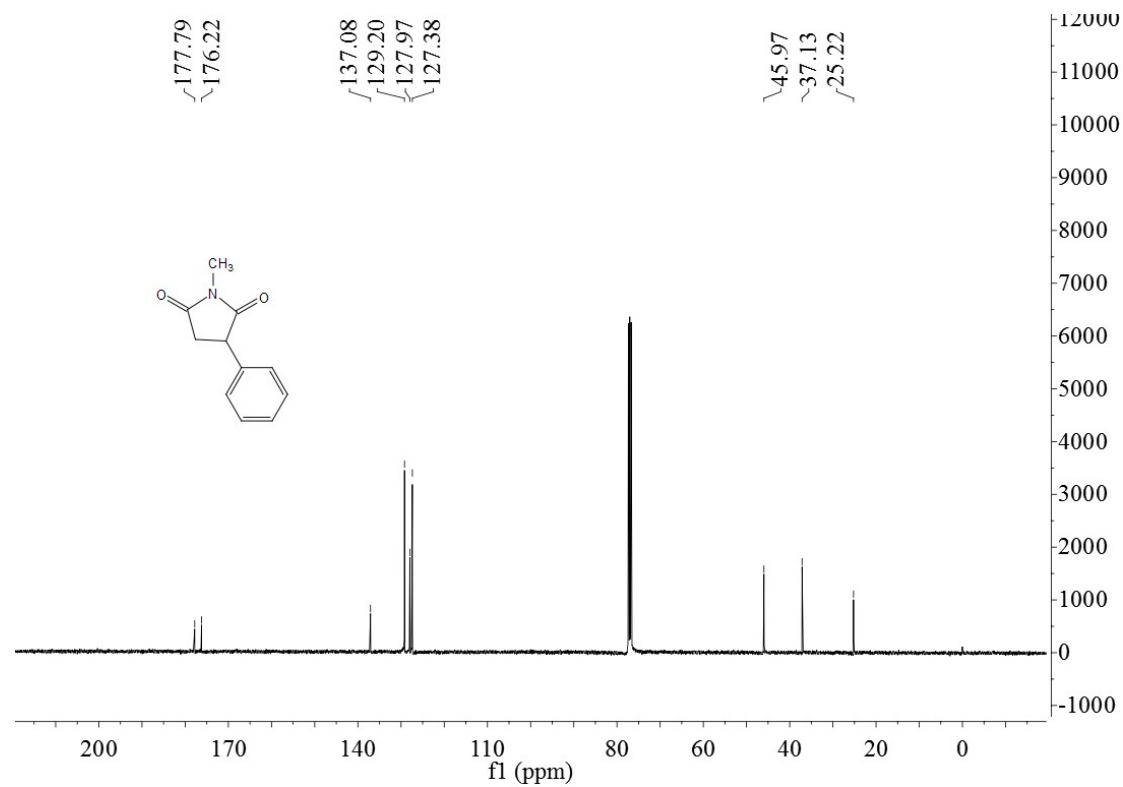

### 3-(4-nitrophenyl)-1-phenyl-Pyrrolidine-2,5-dione (4i) in CDCl<sub>3</sub>

#### <sup>1</sup>H NMR

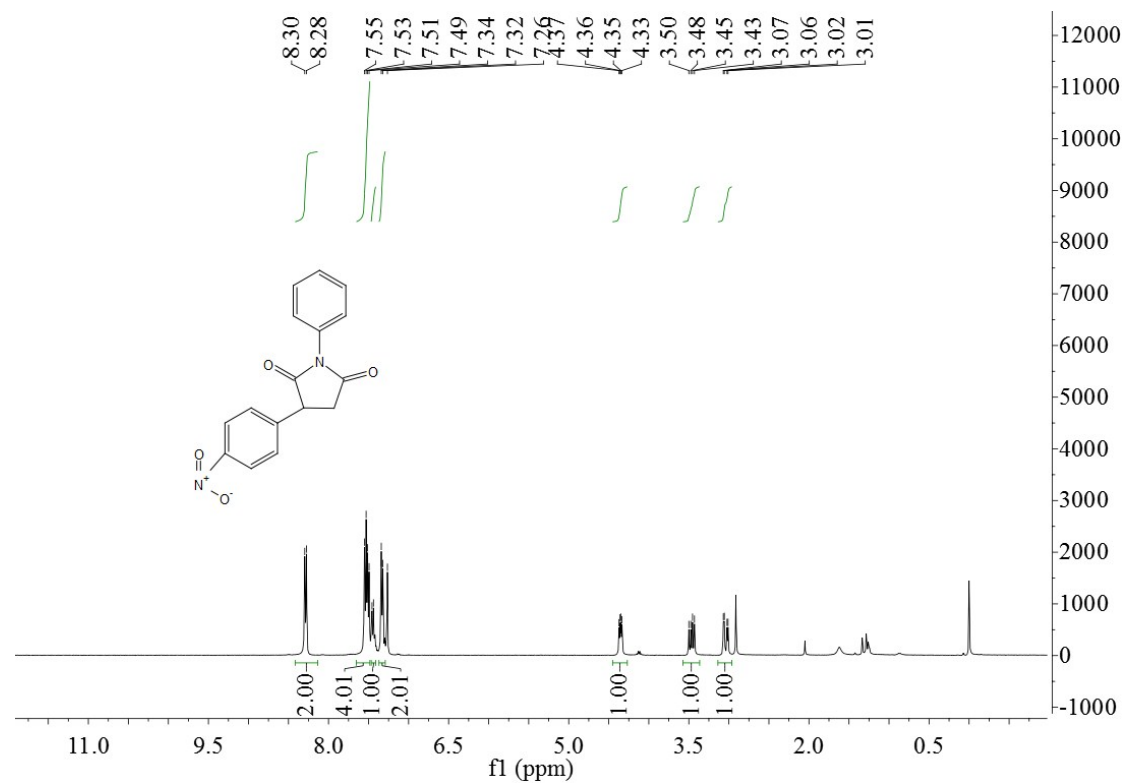

#### <sup>13</sup>C NMR

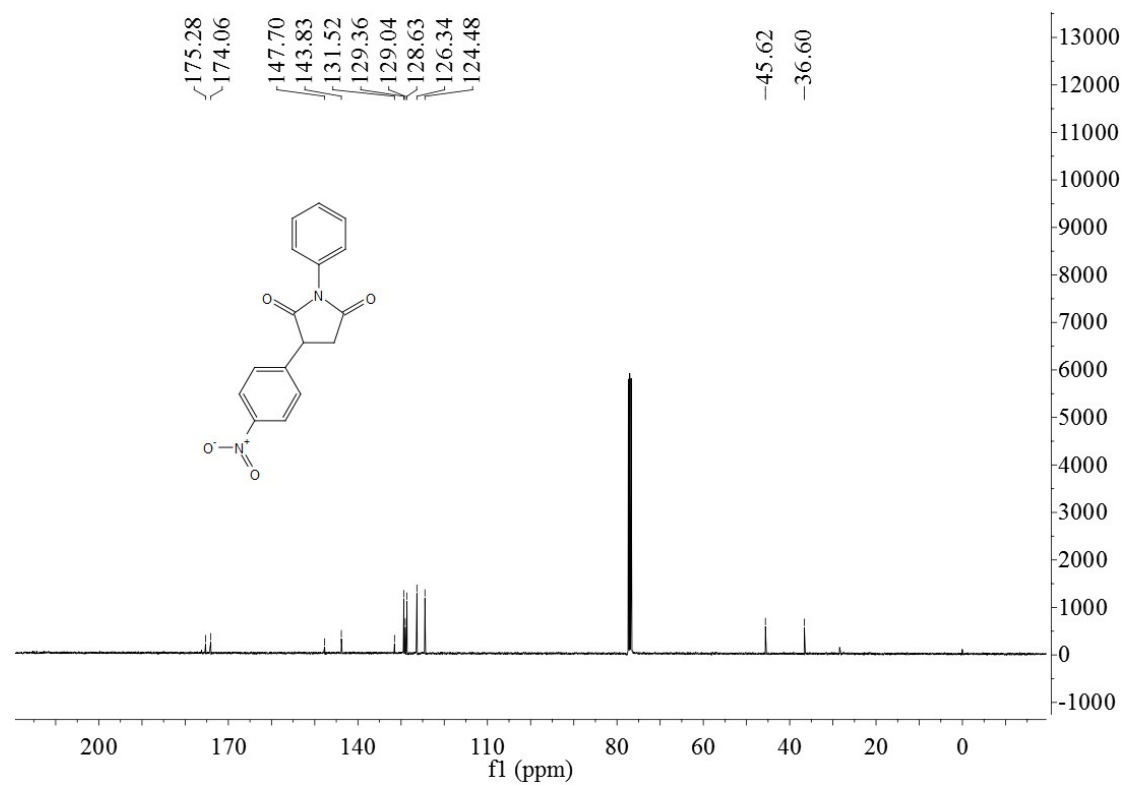

**3-(3-chloro-4-trifluoromethylphenyl)-1-phenyl-Pyrrolidine-2,5-dione (4j) in CDCl<sub>3</sub>**

**<sup>1</sup>H NMR**

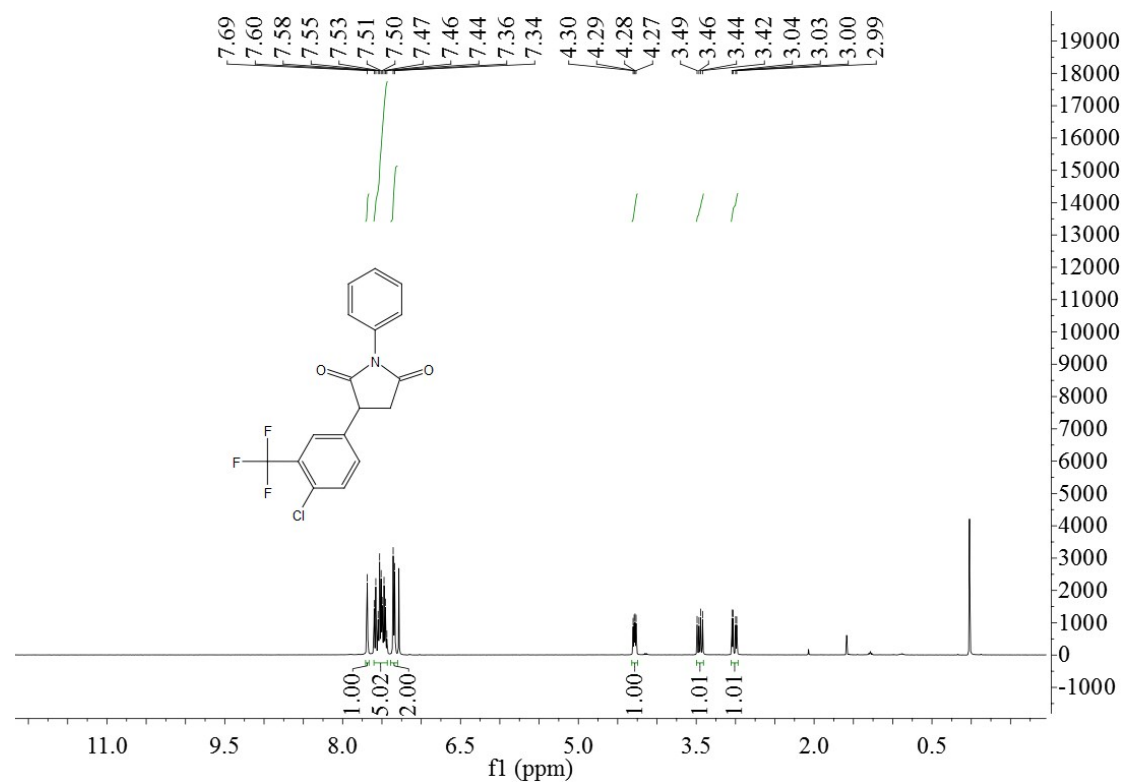

**<sup>13</sup>C NMR**

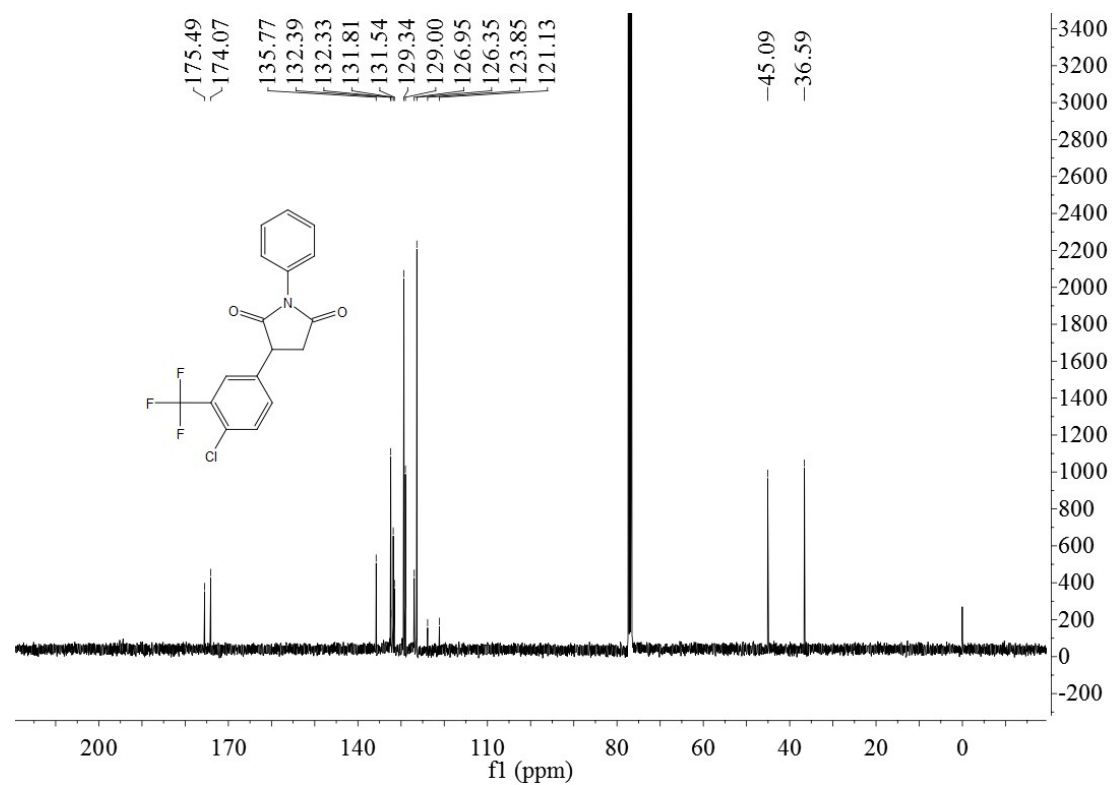

### 3-(4-methoxyphenyl)-1-phenyl-pyrrolidine-2,5-dione (4k) in DMSO-d<sub>6</sub>

#### <sup>1</sup>H NMR

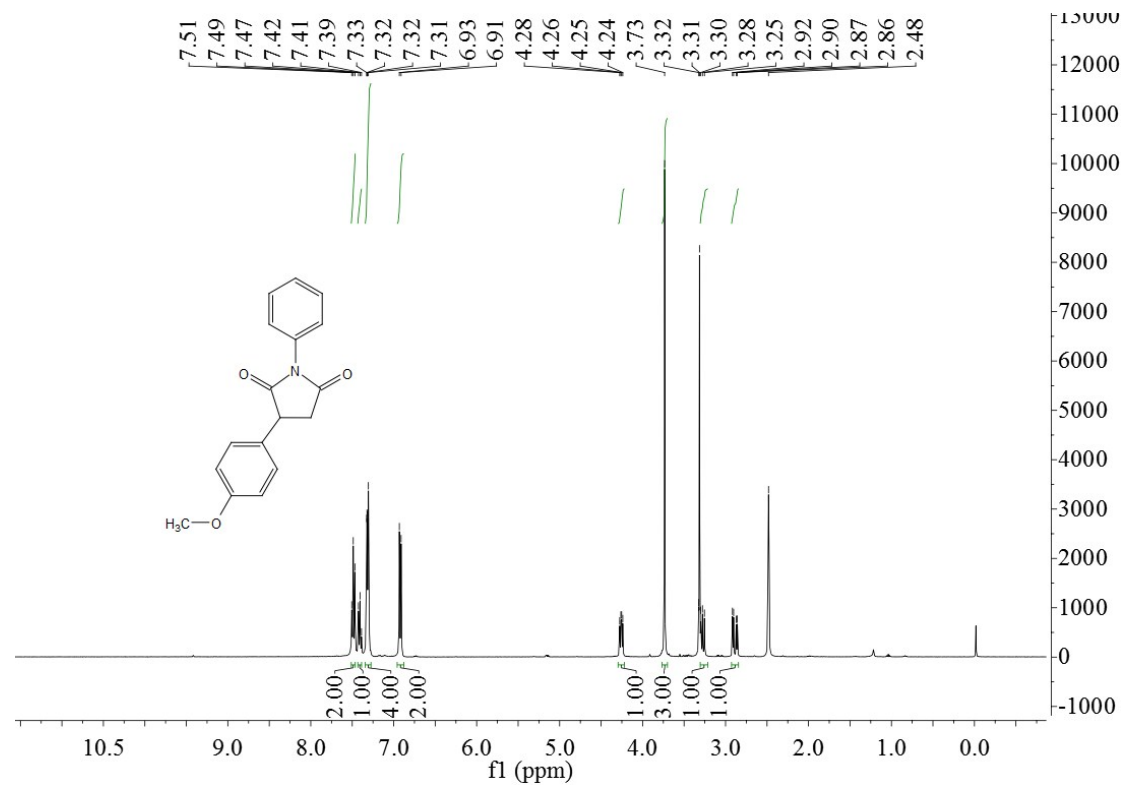

#### <sup>13</sup>C NMR

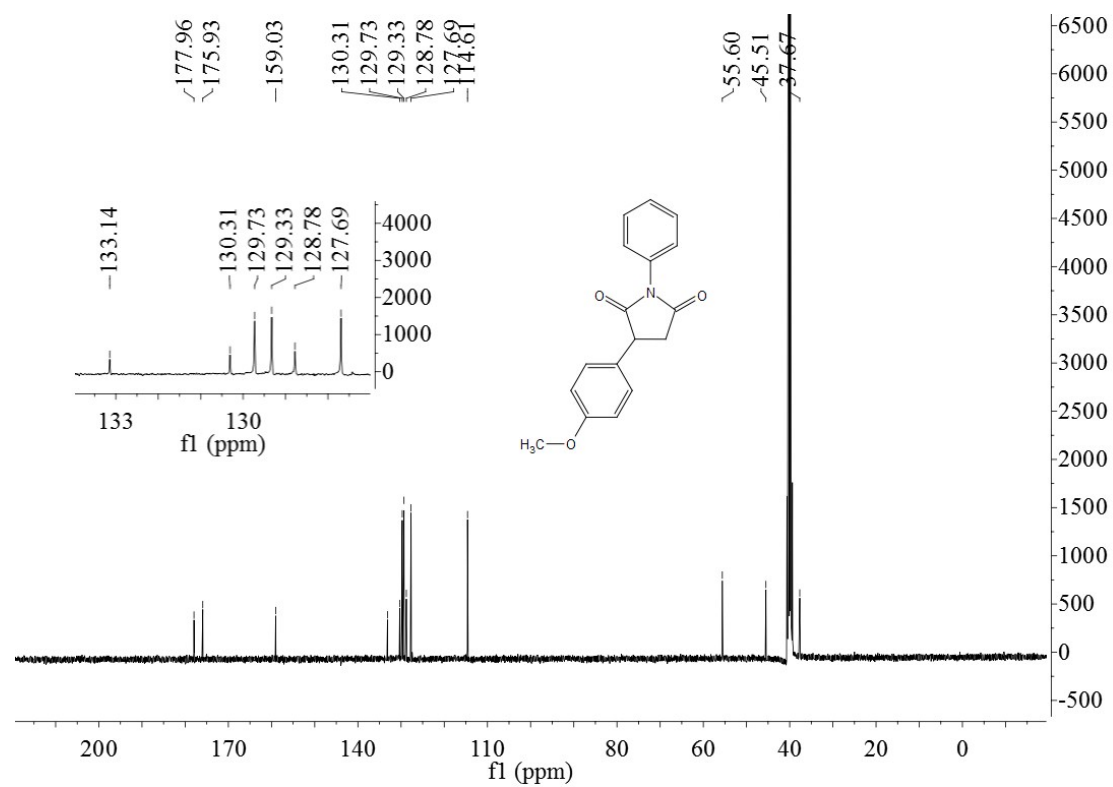

### 3-(4-methoxyphenyl)-1-benzyl-pyrrolidine-2,5-dione (4l) in DMSO-d<sub>6</sub>

#### <sup>1</sup>H NMR

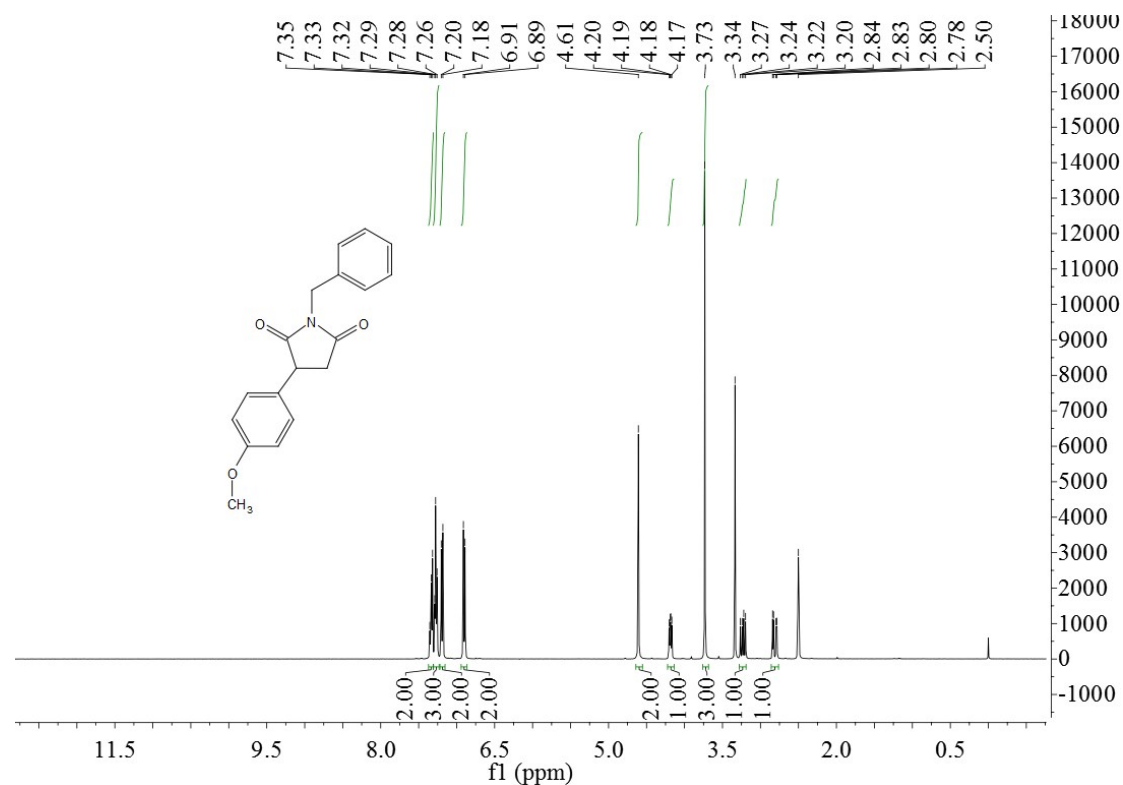

#### <sup>13</sup>C NMR

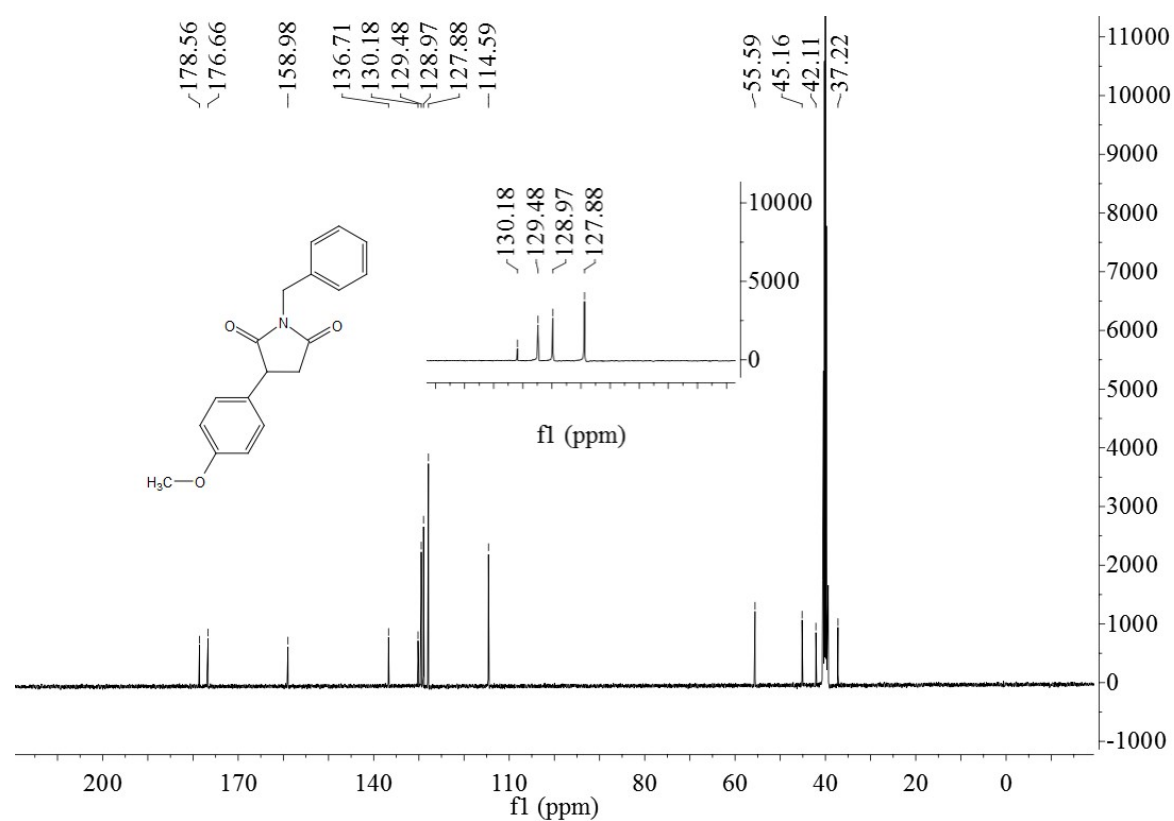

### 3-phenyl-1H-pyrrole-2,5-dione (5a) in DMSO-d<sub>6</sub>

#### <sup>1</sup>H NMR

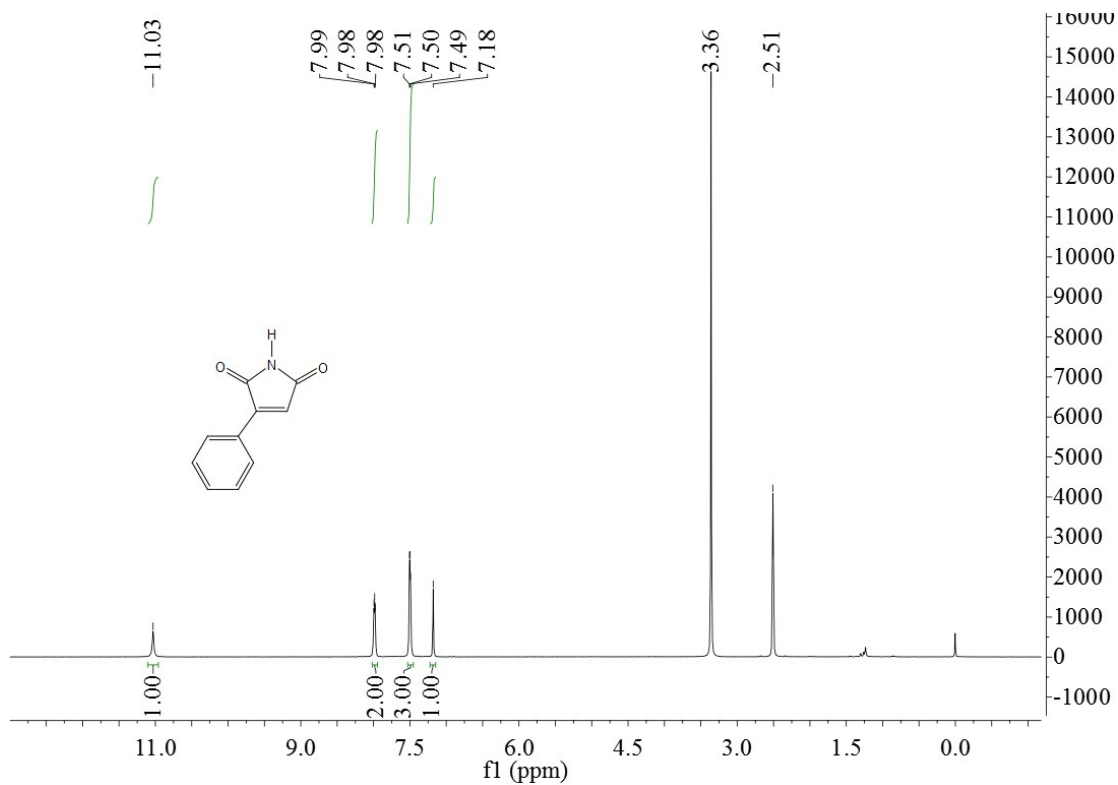

#### <sup>13</sup>C NMR

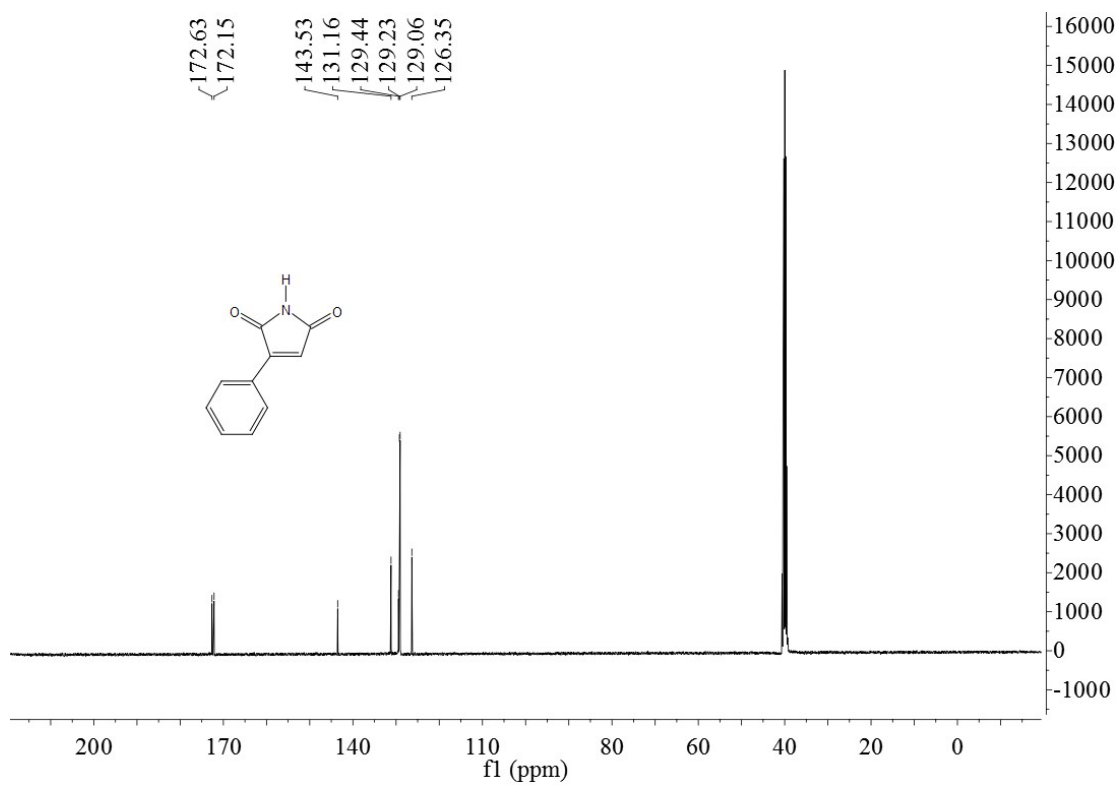

### 3-(3-chloro-4-trifluoromethylphenyl)-1H-pyrrole-2,5-dione (5b) in DMSO-d<sub>6</sub>

#### <sup>1</sup>H NMR

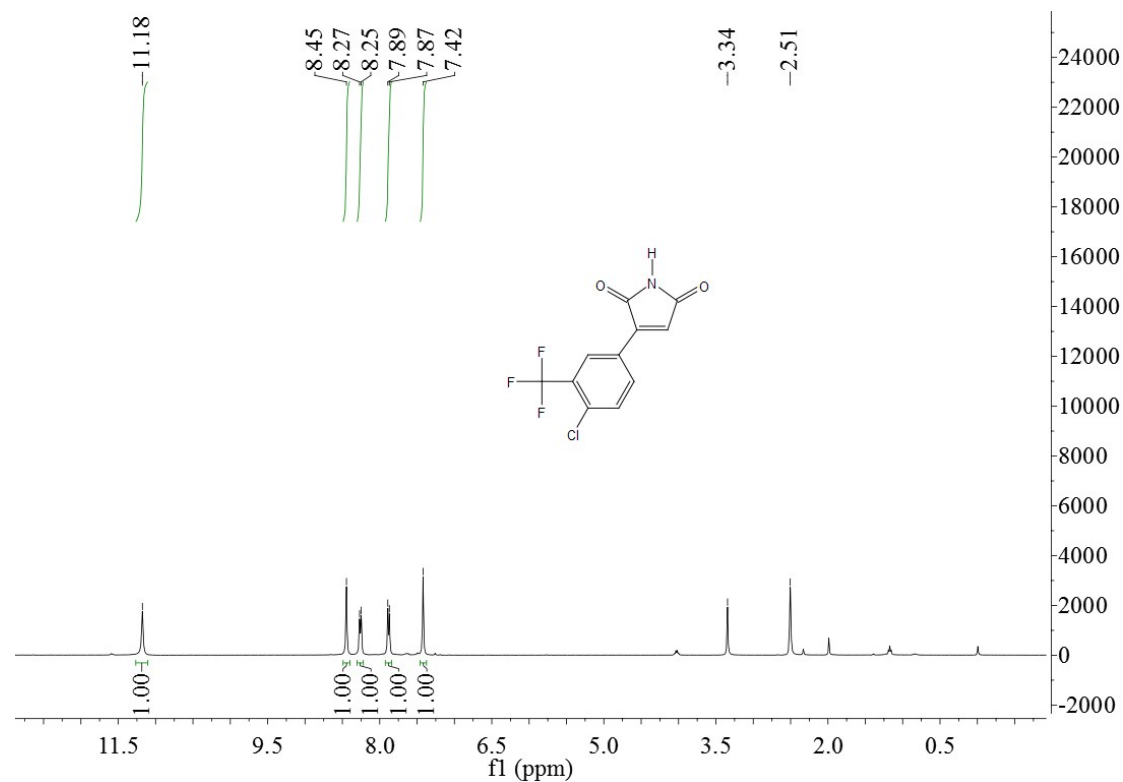

#### <sup>13</sup>C NMR

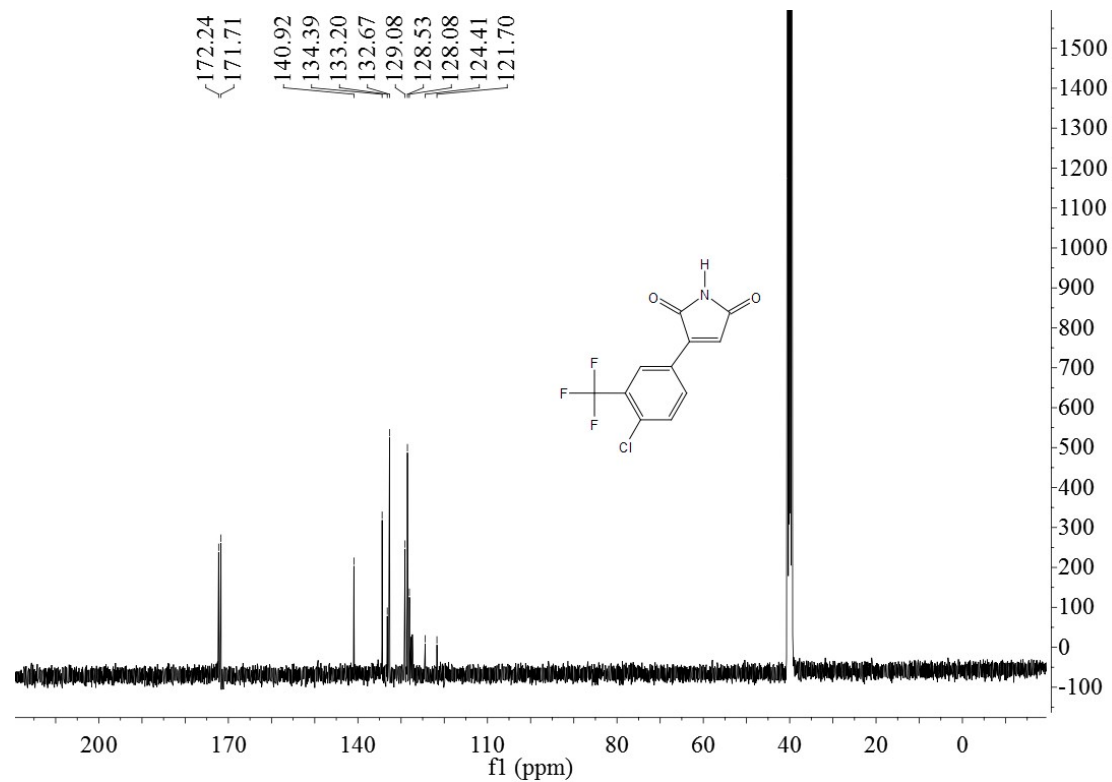

### 3-(4-bromophenyl)-1H-pyrrole-2,5-dione (5c) in DMSO-d<sub>6</sub>

#### <sup>1</sup>H NMR

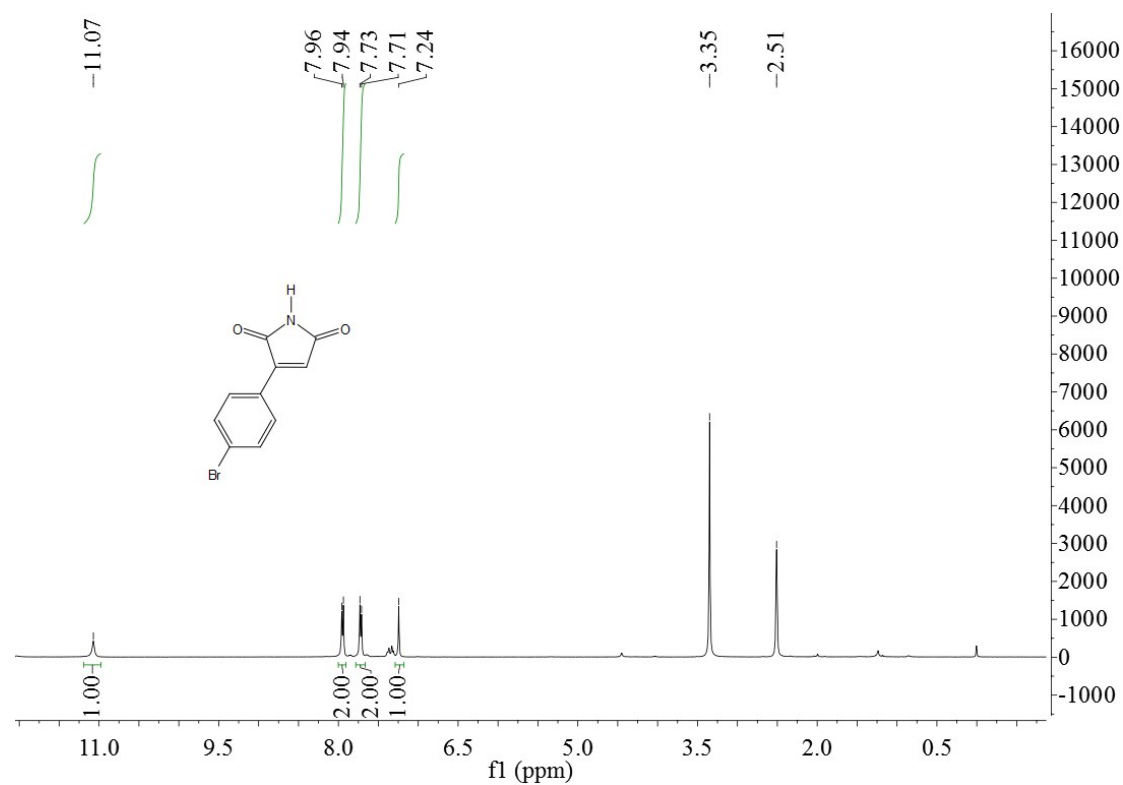

#### <sup>13</sup>C NMR

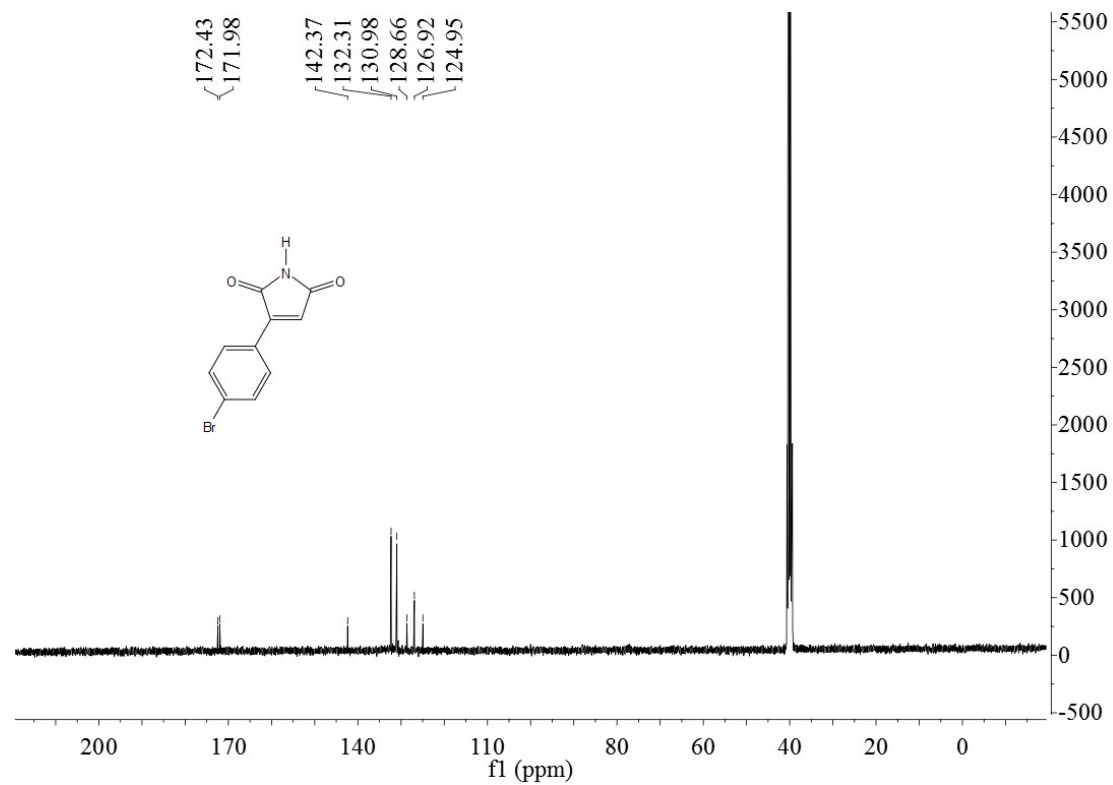



### 3-(4-chlorophenyl)-1H-pyrrole-2,5-dione (5d) in DMSO-d<sub>6</sub>

#### <sup>1</sup>H NMR

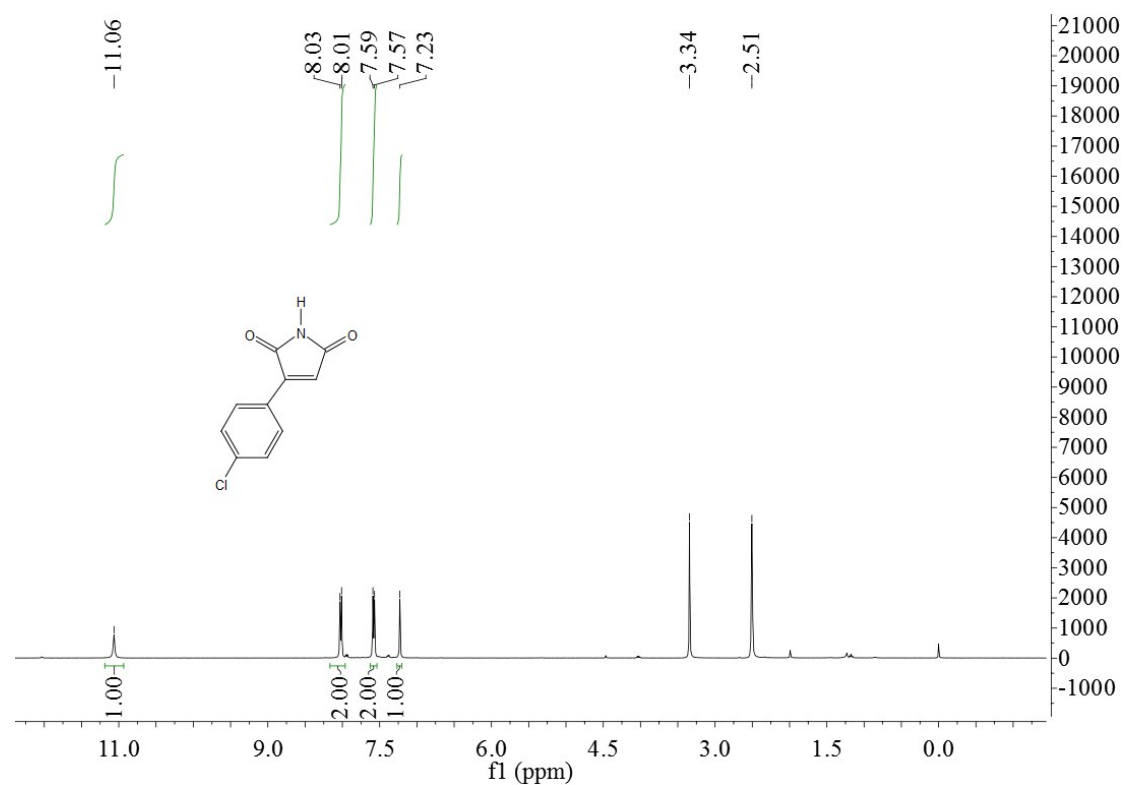

#### <sup>13</sup>C NMR

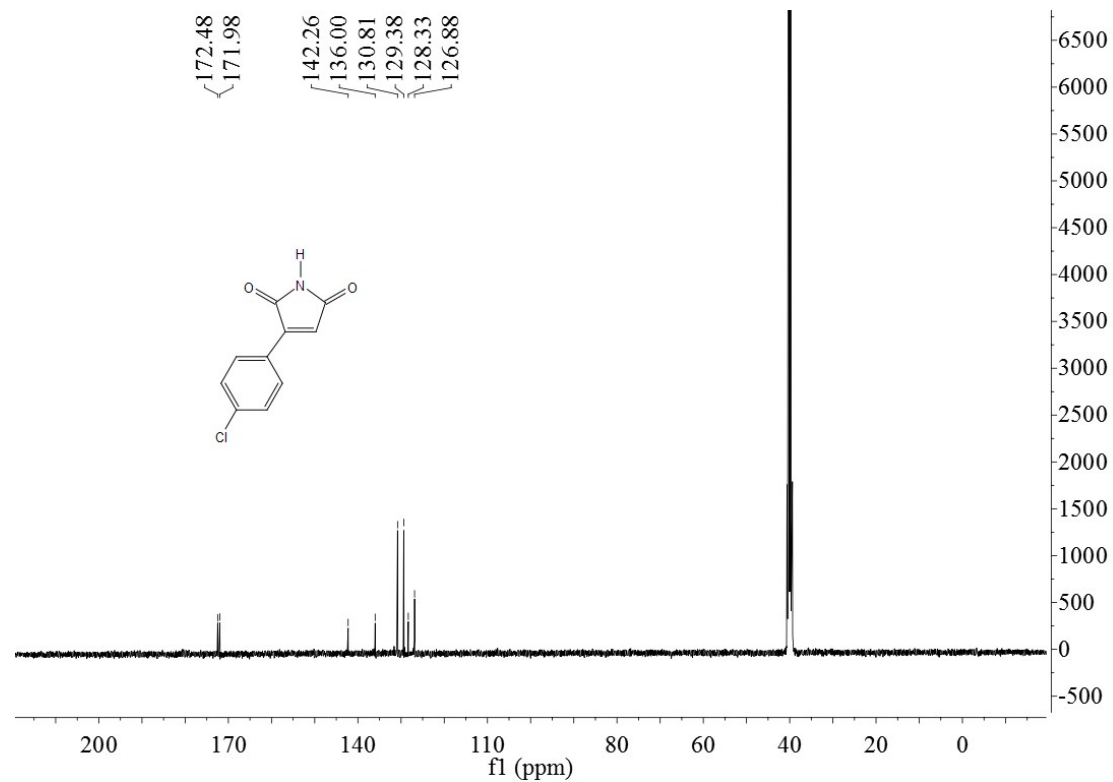

### 3-(4-methoxyphenyl)-1H-pyrrole-2,5-dione (5e) in CDCl<sub>3</sub>

#### <sup>1</sup>H NMR

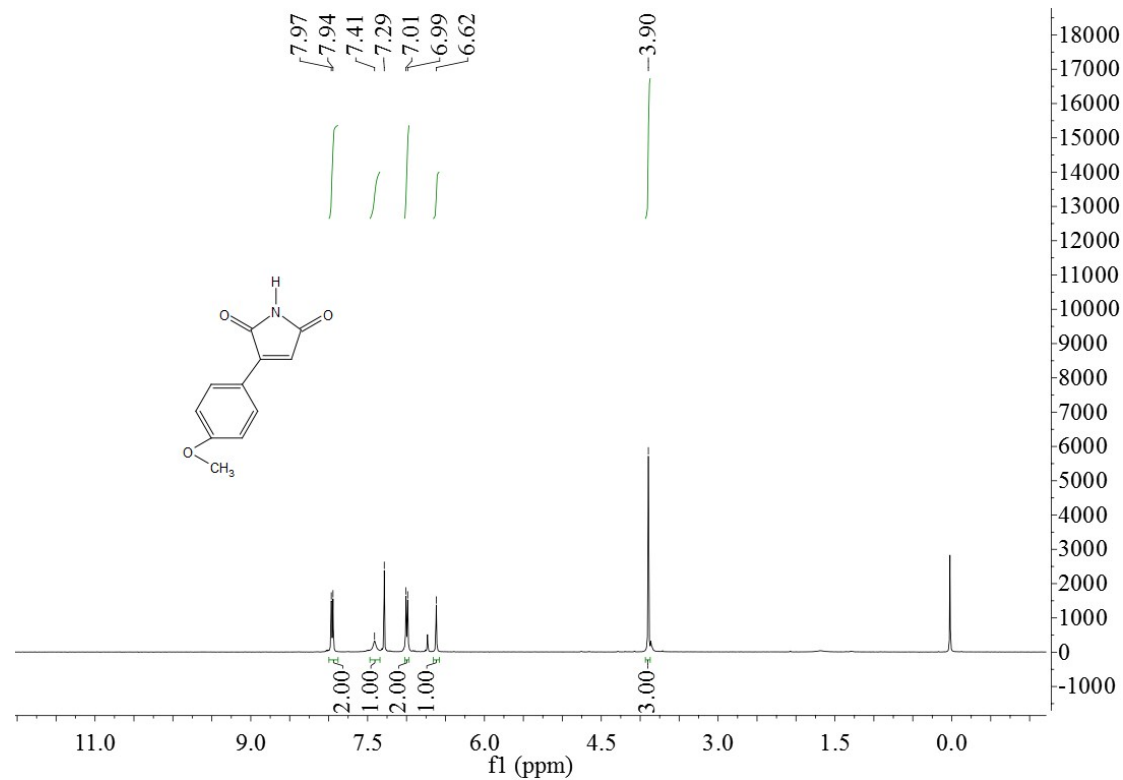

#### <sup>13</sup>C NMR

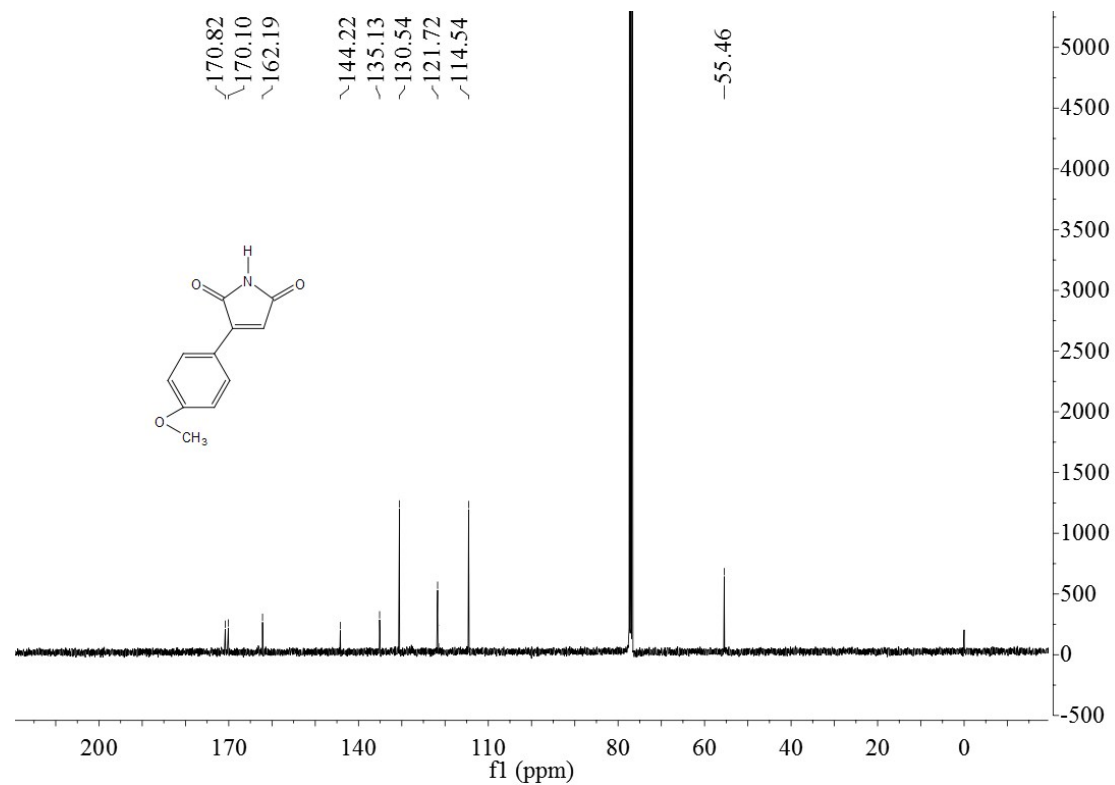

### 3-(4-bromophenyl)-1-phenyl-1H-pyrrole-2,5-dione (5f) in DMSO-d<sub>6</sub>

#### <sup>1</sup>H NMR

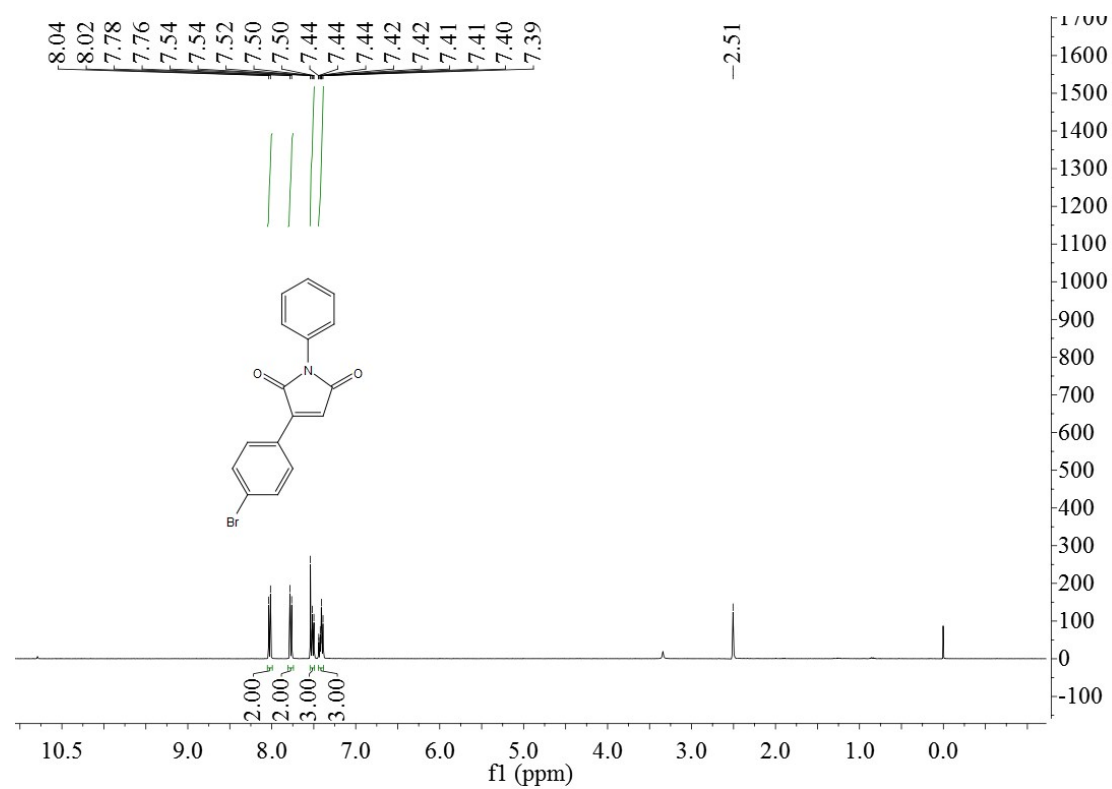

#### <sup>13</sup>C NMR

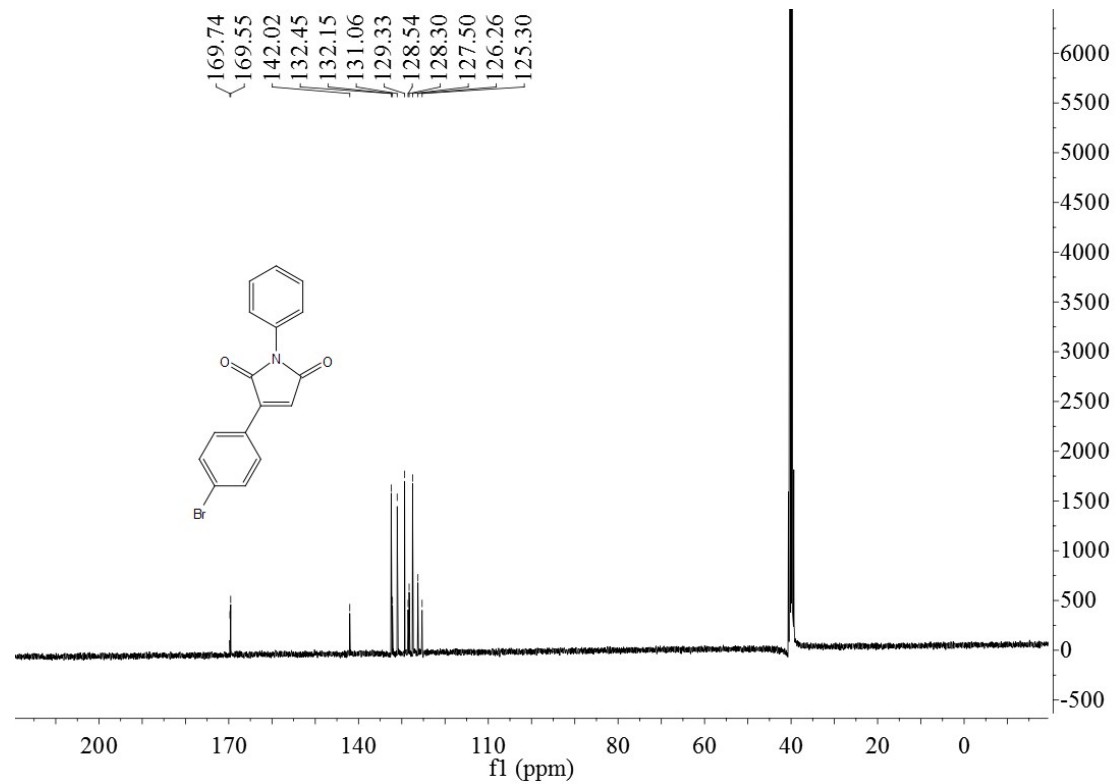

### 3-(4-nitrophenyl)-1H-pyrrole-2,5-dione (5g) in DMSO

#### <sup>1</sup>H NMR

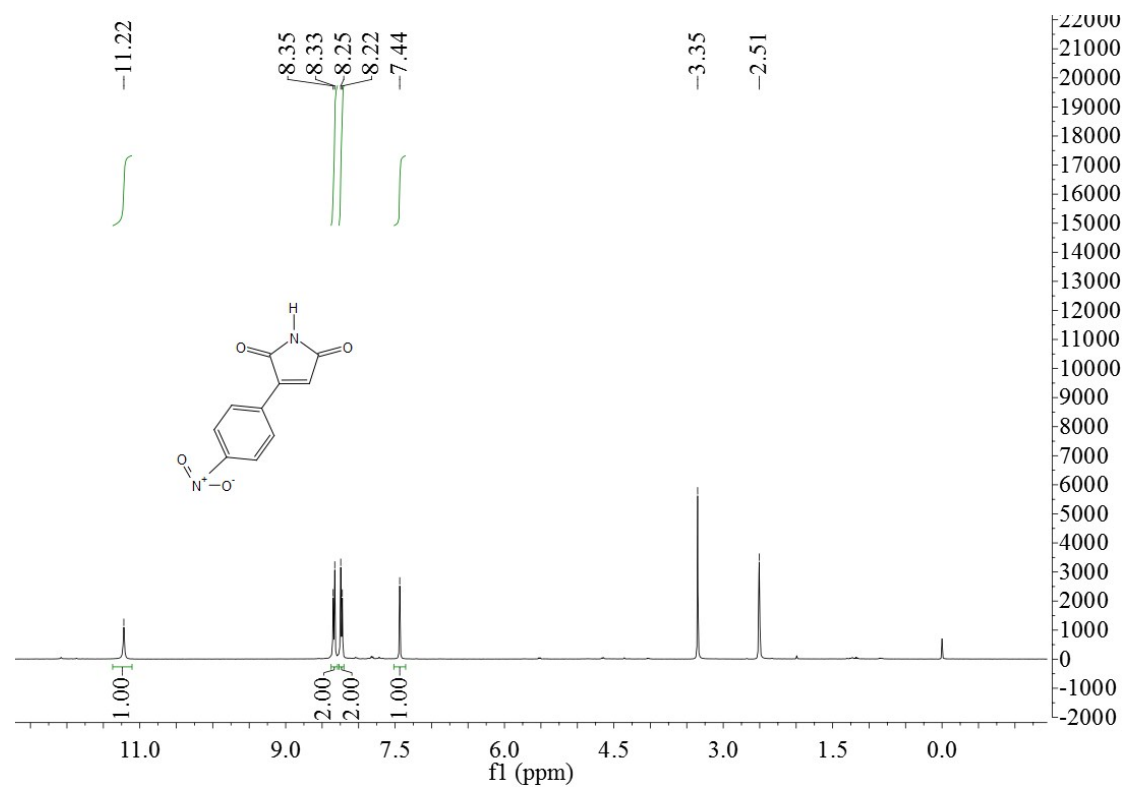

#### <sup>13</sup>C NMR

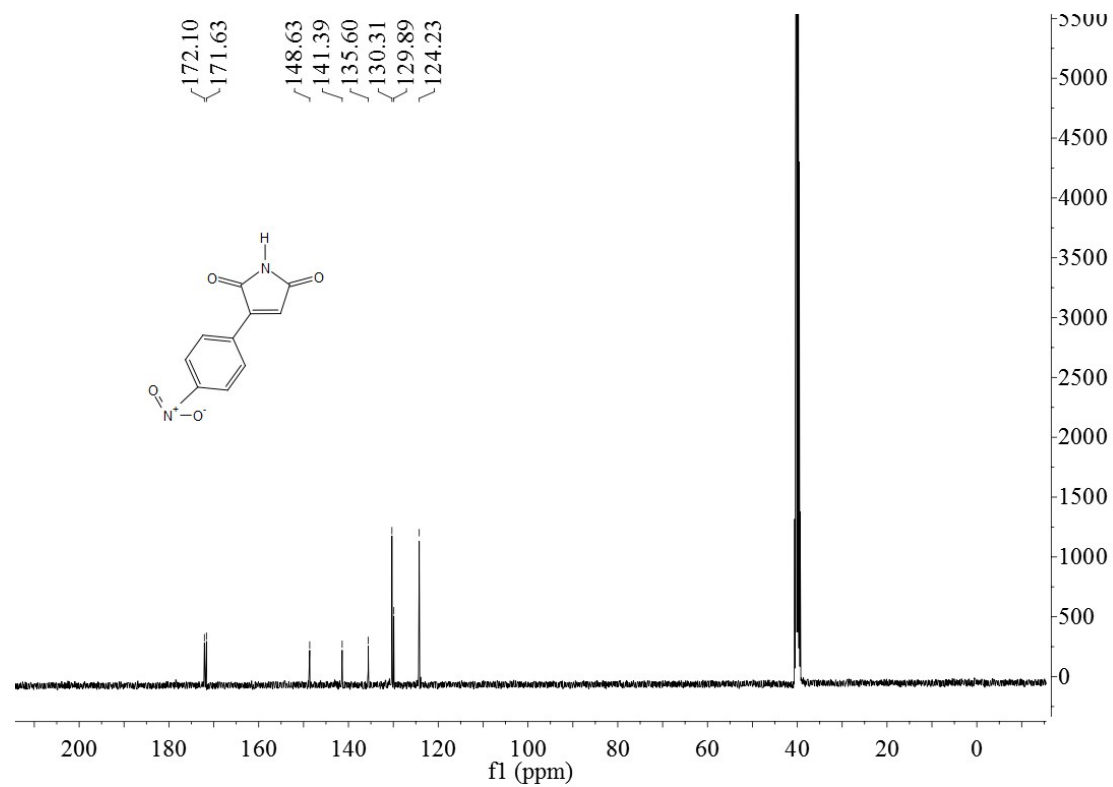

Supplement: c6ra00136j1.pdf [file c6ra00136j1.pdf]
